# Supplementary material for: Nitric Oxide Improves the Tolerance of Pleurotus ostreatus to Heat Stress by Inhibiting Mitochondrial Aconitase
Source: PubMed Central journal article supplement (PMC7028963; doi:10.1128/aem.02303-19), 2020-02-18
Supplement: AEM.02303-19-s0001.pdf [file AEM.02303-19-s0001.pdf]

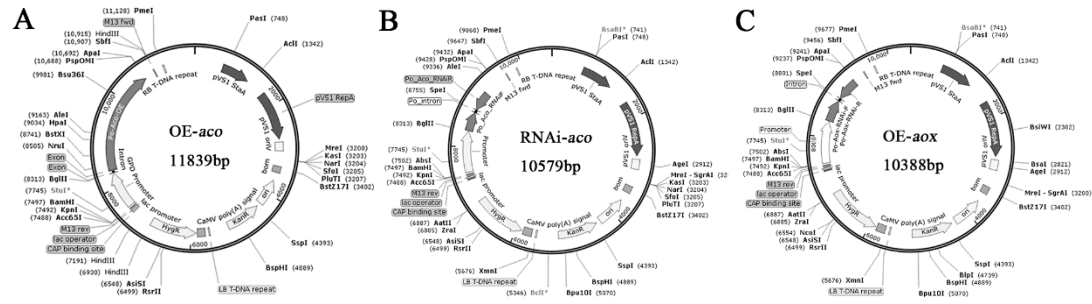

**Supplemental Fig. S1** Strategy for the overexpression and RNA interference of target genes in *P. ostreatus*. A. The structure of the OE-*aco* vector. B. The structure of the RNAi-*aco* vector. C. The structure of the OE-*aox* vector.

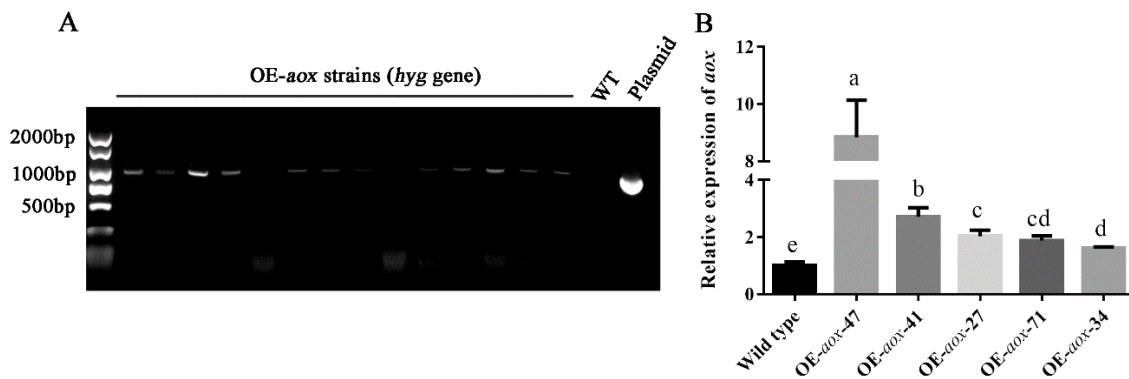

**Supplemental Fig. S2** Validation and selection of OE-*aox* strains. A. Preliminary selection of OE-*aox* transformation strains by amplification of the *hyg* gene. B. qPCR analysis of the expression of *aox* in the tested strains. The values are the mean  $\pm$  SE. Different letters indicate significant differences for the comparison of samples ( $P < 0.05$ , according to Duncan's test)

### Supplemental gene sequence

>*aco\_cDNA\_Pleurotus ostreatus\_CCMSSC00389*

```

ATGTTCAACCTAGCGAACCGCACTGCCGGTGCTCTTCGCTCGCTGCAGCGCATGGCCG
CCGGCATGGCCACAGCTGCACCGGAGCGAATTGGAGATACCAAAGTTCCTATGAGTTT
GCTTGAAAAGGGCGCATAACACTACCAGCGTATAGAGGACAACCTGGTCATCGTT
CGCGATAGATTGAAGCGACCATTGACCCTATCGGAGAAAATTCTTTACGGTCATCTTGA
CGATCCTCATGGACAAGATATTGAACGTGGTGTCTCATATCTCAAGCTGCGGCCTGACC
GAGTCGCCTGCCAGGACGCTACGGCGCAGATGGCTATCTTACAATTCATGTCTGCTGGC
ATGGACACTGCTGCCGTTCCGACCACCGTACACTGTGACCACTTGATTGAGGCCCAAG
TTGGTGGTGTCAAGGATTTGGCCCGCGCTATCGATATCAACAGGGAGGTTTACGACTTT
TTGGCTACTGCTACTGCGAAGTACGGTCTTGGTTTCTGGAAACCCGGCTCTGGTATTAT
CCATCAAATCATTGAGAACTACGCATTCCCTGGTGGTCTTAIGATTGGCACTGATTC
GCACACGCCCAACGCTGGTGGCCTCGGTATGATTGCATGTGGAGTTGGAGGTGCTGAT
GCAGTCGACGTCATGGCGGGCCTACCATGGGAAGTAAATGCCCGAAGGTCATTGGTG
TTAACCTTACTGGTAAAATTAGCGGCTGGACTTCCCCCAAAGATGTTATTCTCAAGGTT

```

GCTGGCATATTGACGGTCAAGGGTGGAACTGGCGCTATCGTCGAATACAAGGGTCCTG  
GTGTTGAATCACTCTCGTGCACGGGTATGGCGACTATTTGCAACATGGGTGCTGAGATA  
GGCGCAACAACGTGCATGTTCCCATCAACAACCGCATGGTCGACTATCTAAAGGCCA  
CCAAGCGCGGCGACATTGCCAACTATGCTTCTCGCTTCGCACACAATCTCCAGGCTGAT  
GAGGGTTCCCAATACGATGAACACATCGAAATTA ACTTTGTCAGA ACTCGAGCCACACG  
TCAACGGTCTTTTACTCCCAGTCTCGCCACCCCAATTTCCAAGTTCCGCCAGGCTGTT  
GAGGAGAACAAGTGGCCGCTGAGCTCAAGGTCGCCTTGATCGGTTCTTGC ACTAACT  
CTTCGTACGAGGATATGTCTCGCTCTGCCTCCATCGCCAACGAAGCCAAGGCACACGG  
TCTCTCCGTCGCAAGCAAGTACACCATCACTCCCGGTTCCGAGCAAGTCCGCGCTACC  
ATCGCCCGTGACGGTCAAATGGCTGCTCTTGAGGATGTTGGAGGCTTGGTTTTGGCCA  
ACGCCTGCGGTCTTGCATCGGTCAATGGGACAGGAAGGATGTTAAGAAGGGCGAAC  
CCA ACTCTATCATCACTTCTTACAACCGTAACTTCACTGGCCGTAACGATGCTAACCC  
GCTACTCATGCCTTCGTGCCTCCCCGATATCGTGACCGCCATGGCCTTCGCTGGCGA  
CCTCCGTTTCAATCCCCTCACTGACTCCCTCAAGGGTGCCGACGGCAAGGAATTCAAG  
TTTTCCGCCCCACTGGCAACGAGCTCCCCCTCGCGGTTATGACCCCGGTGAAGATA  
CCTTCCAACCTCTCCCGAGGATCGTGCCTCTGTCCAAGTTGCCGTCAGCCCCACTAGT  
GACCGTCTTCAGCTGTTGAAGCCCTTCCAGCCATGGGACGGCAAGACACCAAGTGATC  
TCCCATCTTGATCAAGGTCAAGGGCAAGTGACAACCGATCACATCTCCGCCGGTGG  
ACCATGGCTCAAATACCGTGGCCATCTCGAGAACATCTCGCAAACTGTCTGATTGGTG  
CCATCAACATTGAGAACGGTGAGGCCAACAAGGTCAAGAACCAACTTACTGGTGAAT  
GGGGAGGAGTCCCCAGACTGCTGCCTCTACCGCGAGAAGGGCATCAAGTGGGTGCG  
TCATTGGTGACCACA ACTATGGTGAAGGTT CATCTCGTGAGCACGCCGCCCTCGAGCC  
CCGCTTCTCGGCGGTCTCGCCATCATCGTCCGCAGCTTTGCCCGTATCCACGAAACCA  
ACTTGAAGAAGCAAGGCATGCTTGCTTTGACCTTCGTTGACCCCGCCGACTACGACAA  
GATTCGTCCAGACGACAAGGTCGATATCCTCGGCCTCGAGGACTTCAAGCCCGGCCAG  
AACTTGACTCTCAACGTCAAGCACTCTGACGGCGCCTCCGAGCAGATCCCCCTCGCAC  
ACTCCTTCAACGAGGGACAGATTGAGTGGTTCAAGGCTGGCTCAGCATTGAACTTGAT  
GGCTGCTAAGGCCAAGGGCAACTAG

>ox\_cDNA\_Pleurotus ostreatus\_CCMSSC00389

ATGCTTCGCGCGCAACTCCACCAACAGGTATGTAGACAGGTCACAGGACGGTCCTTTG  
TCTGGTCTCTCTGGCTACACCCCTCGCGACTAGTCGCCGAACCTTTTCCACCACACCG  
AACCCCTTTAACGCCTTGACAAGTGATGCTGCGAAAGCTGCTGCAACTCCACATCCAA  
CTGTTGGGAAGGGCCAGGCGCCACAACGAGCGAGCTCCGCAGACGGAGCAATAACGC  
AGTCGACGCCGGTCAACACGGTGCCCACTATGATCAGAGGCGATTGGGTCTCTTTCA  
CCCTGTTTATACGCCGAAGAGTTGAAGGCGGTGCAGATTCTACACAAAGAGACAAAA  
TCTATGACAGATAAGATCGCATAACGGTCTTGTCAGATTGGCCAGGGCTGGGTTTCGATTT  
CGTCTCGAGATATAAACACAAACCCCTTCTCCTAGCCATAACATGACCCTGCAAGAGC  
TTCGCAACGAAGGTTACCTCCTGGATCAGAATGCATGGCTTAACCGAATTCTATTCTTG  
GAAACGATCGCAGGTGTGCCCGGTATGGTAGGTGCGACCTTGCGGCATCTACAAAGCC  
TACGTTTAATGCGGCGTGACAATGGGTGGATCCACACTCTTCTATCGGAATCGGAAAAC  
GAGCGGATGCACTTGATGACTTTTATGACTTTGAGGCGGCCTACACCATTCTTCAGGGC  
GTTGGTTCTCGGTGCACAGGGTGTCTTCTACA ACTTGCTCTTTTTGACGTACATCGTCT  
CACCTCGAGCTTGCCATCGCTTCGTCCGATATCTTGAAGAGGAAGCTGTCATCACTTAT  
ACTCGCTGTATACAGGACCTGGAAGCAGGCCGAATCCCTGAATGGGAGAATGAGCCTG

CACCCGAGATCGCCATCGATTACTGGCGCTTGCGCCCGGATGCCAAATTACTCGATGTT  
CTCTACGCTGTTTCGATCCGATGAAACGACACATCGATTTCGTCAACCACAGTCTTGCCGA  
CCTGAATACAACAACAGACGTCAATCCTTTTCGCATTCAGGGAACCGGATATGCATGTTA  
AAGGGAACAAGATTGGATTTCGAGCGTTCGGAGTCGGAGAAATATGTCCAGGAATCTCA  
TGATCTATATCTTCAAGAGAAGCAGAAAGGTAGTAATTGA
